# Supplementary material for: The Effects of Harvesting Period and Inoculant on Second-Crop Maize Silage Fermentative Quality
Source: MDPI journal article supplement (doi:10.3390/agronomy14050982), 2024-05-07
Supplement: s1 [file s1]

Archive with 1 entries (1 files):
- agronomy-2934603-supplementary.pdf
