# Supplementary material for: The Effects of Harvesting Period and Inoculant on Second-Crop Maize Silage Fermentative Quality
Source: MDPI journal article supplement (doi:10.3390/agronomy14050982), 2024-05-07
Supplement: s1 [file s1 › agronomy-2934603-supplementary.pdf]

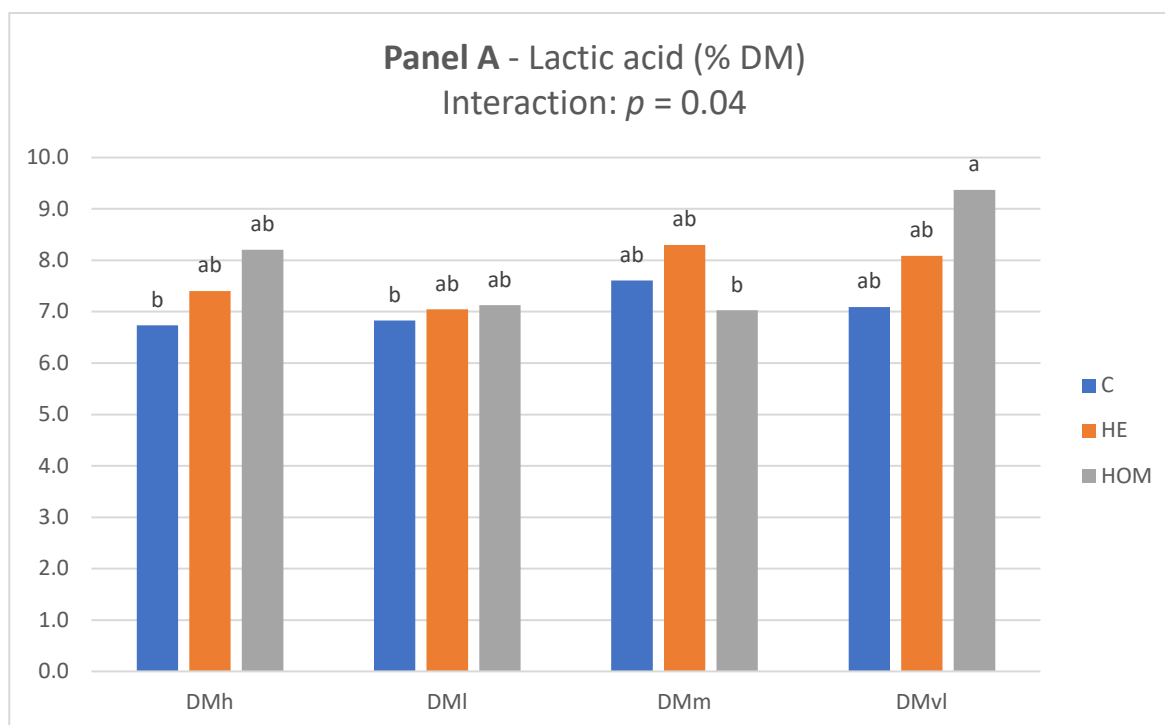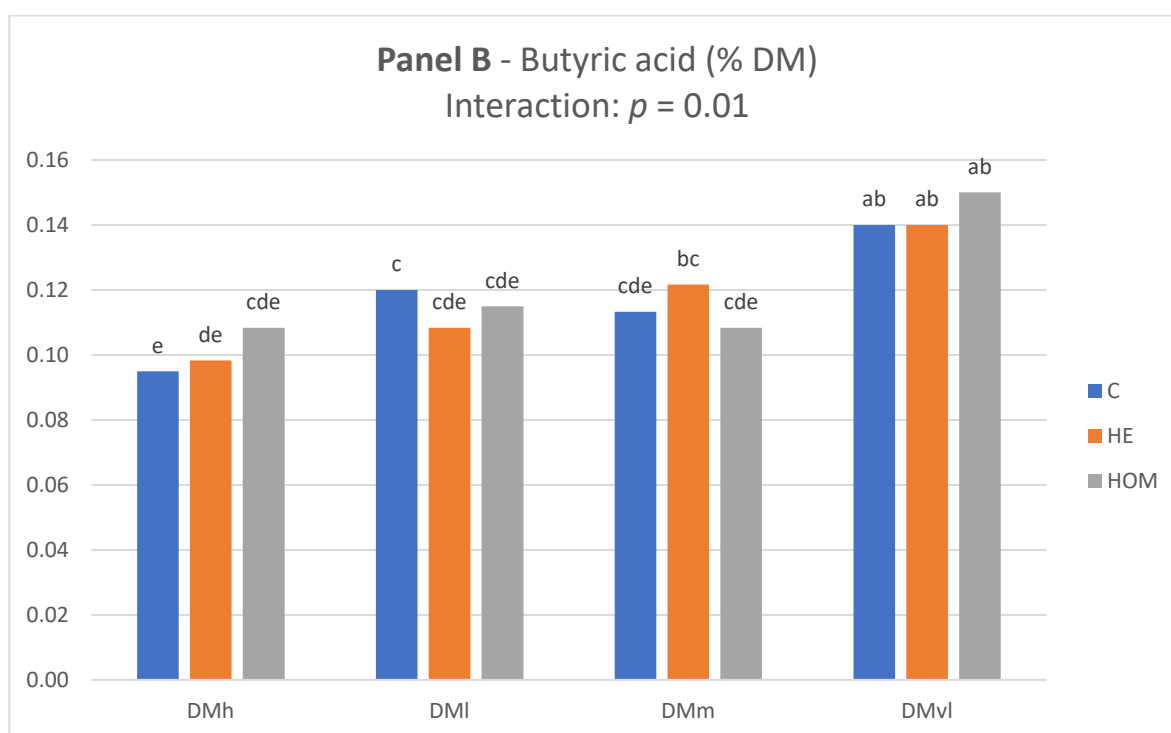

Figure S1. The effect of the interaction between harvesting DM class per inoculant type on the lactic acid (**panel A**) and butyric acid (**panel B**) of maize silage after 60 days of ensiling.

DM = dry matter. DMvl = DM very low; DMI = DM low; DMm = DM medium; DMh = DM high. C = control; HE = heterofermentative; HOM = homofermentative. <sup>a, b, c, d, e</sup> indicate statistical difference ( $p < 0.05$ ).
